# Supplementary material for: In vitro and in vivo exploration of the cellobiose and cellodextrin phosphorylases panel in Ruminiclostridium cellulolyticum: implication for cellulose catabolism
Source: PubMed Central journal article supplement (PMC6720390; doi:10.1186/s13068-019-1549-x), 2019-09-03
Supplement: 13068_2019_1549_MOESM1_ESM.pdf [file 13068_2019_1549_MOESM1_ESM.pdf]

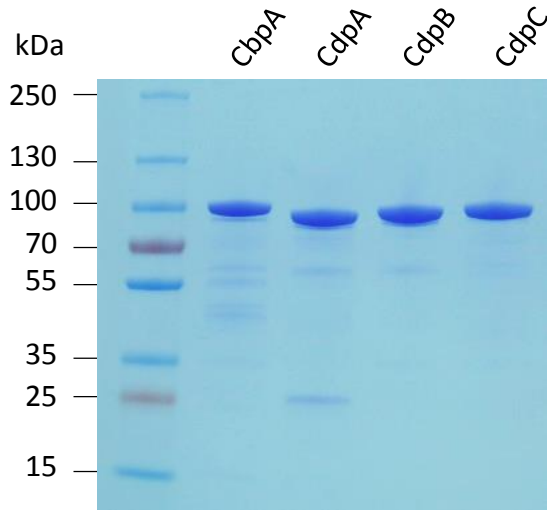

**Additional file 1. Purified recombinant phosphorylases.** Samples of purified recombinant proteins (3 $\mu$ g) were loaded on gradient 4-15% SDS-PAGE then Coomassie Blue stained. The recombinant cellobiose phosphorylase (CbpA) and CdpA, CdpB and CdpC have theoretical molecular weights of 93.5 kDa, 90.5, 91 and 94 kDa, respectively.
