# Supplementary material for: In vitro and in vivo exploration of the cellobiose and cellodextrin phosphorylases panel in Ruminiclostridium cellulolyticum: implication for cellulose catabolism
Source: PubMed Central journal article supplement (PMC6720390; doi:10.1186/s13068-019-1549-x), 2019-09-03
Supplement: 13068_2019_1549_MOESM2_ESM.pdf [file 13068_2019_1549_MOESM2_ESM.pdf]

$\eta_3$   $\beta_{32}$   $\alpha_{18}$   $\alpha_{19}$   $\eta_4$   $\alpha_{20}$   
 600 P A Y T E Y D T T K . . . . . G . . . . . G W T T F . . P P G T K E N G G T F L H T P W V M I . . S V V M I G . . . . . H G D K A F M Y Y N Q T L P G K R N D D A E I Y  
 CdpA  
 609 P P S T K . . . . . T I . . . . . P P I F M S L . . Y P P G I K E N A S I F L M A E . . A W I I Q A A M M G . . . . . H G N R A W D Y Y N S T N P A A Q N D S A D L R  
 CdpB  
 637 P P A F R . . . . . E Y . . . . . G . . L P V A R M S L F N A G T K E N A G I T S Q P G W V I I . . A T T I G . . . . . N G N R A F E Y Y T E T N P A A M N D H A F I R  
 CdpC  
 625 P P A F T K Y Y V N M . . . . . G . . . . . E S T Y . . P A G Y K E N A G I T C H N P W I I A . . G T V L G . . . . . R G D R A F E Y Y S K L A P A Y T E I S D I H  
 CbpA  
 5NZ8 789 P A . D . . . . . L N K I A N D T . . . . . A G H Y . . F F G D R E N G A V P K H A M M A V A . . A L I K A A K K V K D N E L A K E M A R I A Y F M I D L V L P Y K N L E N F E Q V  
 consensus>70 P a . . . . . g . . . . . G . k E N . . ! F . . n . . . . . e . . . . . g . . . . . g d . A f . y y . . i . P . . n # . . e . .

$\beta_{33}$   $\beta_{34}$   $\alpha_{21}$   $\beta_{35}$   $\beta_{36}$   $\beta_{37}$   $\beta_{38}$   
 666 E V P P Y V Y C O N T L G K F H P Q F I G R N S L T S C T A A W N M V A S S Q Y I T G I R A N Y D S T V D P C I P S S W K G K A T R V F R G A T Y Y E V Q N P N R V C A G V  
 CdpA  
 675 H T P P Y V Y S O F T D G L E S P N H C R S H G H W I T G S A S S I M T A V E E I T G L K A D Y D G I I D P I P S E W K E S M V R H F R G R K L N I V Q N S G G V E K G V  
 CdpB  
 703 K L P P Y I H G O A T E G I D T L N H C R S H V H W I T G C A S T V M V S V Y G I T G L Q P E Y N G I K I N D P I P S G W K N K M N V F R N T V L N I T V D N S Q G V E K G V  
 CdpC  
 691 K T P P Y V Y S O M A G K D A K R P C E A K N S L T S C T A A W N F V V S Q N I T G I K P D Y S G I K I D P I P A S W D G K I T T K F R N A V F E I V I S N P E H V S K G V  
 CbpA  
 5NZ8 866 A G N E R I C T Q Y N T D . . . . . T C E N I G P L T S C T A T W L N L N I S . L A G I E Y T R D G I S F N P I L R E E T Q L N F T L K A P K C S Y K E S I T T P V G F A R M E  
 consensus>70 . . # P y ! . . Q . i . g . e . . . . . G . . . . . w L . G t A . . . . . i l G . . . . . d y d g . . i # P c i p . . w . . f . . . . . f r . . . . . i . ! . n . . . . . v . . g v

$\beta_{39}$   $\beta_{40}$   $\beta_{41}$   $\beta_{42}$   
 756 E . . . K . . I V D G V E T E K . I . . P V F E A G T E . H N V V V M K .  
 CdpA  
 765 K . . . K . . S I N D K T I L N . S C L I P L D C M E A V . N T V Q V I M G .  
 CdpB  
 793 H . . . Y . . T V N G K R I D G . C Y I S A D . E L K D T N E I L V V M G K  
 CdpC  
 781 K . . . K . . V V D G K E I G G N I . . I P I F N D E K T . H Q V E V I M G .  
 CbpA  
 5NZ8 951 S S E Y E L F V D G Q I D N T . V . . L P M Y T D E K E . H I V T L K F K .  
 consensus>70 . . . . . i . v d . k . . . . . i p . . . . . ! . . . . . v v m . .
