# Supplementary material for: In vitro and in vivo exploration of the cellobiose and cellodextrin phosphorylases panel in Ruminiclostridium cellulolyticum: implication for cellulose catabolism
Source: PubMed Central journal article supplement (PMC6720390; doi:10.1186/s13068-019-1549-x), 2019-09-03
Supplement: 13068_2019_1549_MOESM5_ESM.pdf [file 13068_2019_1549_MOESM5_ESM.pdf]

## Additional file 5. Bacterial strains and vectors used

| Strain or plasmid                        | Relevant characteristics                                                                                                                                                                                                                                                                                                       | Source or reference |
|------------------------------------------|--------------------------------------------------------------------------------------------------------------------------------------------------------------------------------------------------------------------------------------------------------------------------------------------------------------------------------|---------------------|
| <i>E. coli</i> DH5 $\alpha$              | F <sup>-</sup> <i>endA1 hsdR17</i> (rK <sup>-</sup> mK <sup>+</sup> ) <i>supE44 thi-1 <math>\lambda</math><sup>-</sup> gyrA96 relA1</i> $\Delta$ ( <i>lacZYA argF</i> ) U169 ( $\Phi$ 80 <i>lacZ</i> $\Delta$ M15) <i>recA</i>                                                                                                 | Roche Diagnostics   |
| <i>E. coli</i> BL21(DE3)                 | F <sup>-</sup> <i>ompT hsdS</i> (rB <sup>-</sup> mB <sup>-</sup> ) <i>gal dcm</i> (DE3)                                                                                                                                                                                                                                        | Novagen             |
| <i>R. cellulolyticum</i>                 | Wild-type, H10, ATCC35319, DSM 5812                                                                                                                                                                                                                                                                                            | DSMZ                |
| <i>R. cellulolyticum</i> MTL <i>cbpA</i> | ATCC35319, <i>cbpA</i> ::intron, Erm <sup>r</sup>                                                                                                                                                                                                                                                                              | This study          |
| <i>R. cellulolyticum</i> MTL <i>cdpA</i> | ATCC35319, <i>cdpA</i> ::intron, Erm <sup>r</sup>                                                                                                                                                                                                                                                                              | This study          |
| <i>R. cellulolyticum</i> MTL <i>cdpB</i> | ATCC35319, <i>cdpB</i> ::intron, Erm <sup>r</sup>                                                                                                                                                                                                                                                                              | This study          |
| <i>R. cellulolyticum</i> MTL <i>cdpC</i> | ATCC35319, <i>cdpC</i> ::intron, Erm <sup>r</sup>                                                                                                                                                                                                                                                                              | This study          |
| pET22b(+)                                | <i>E. coli</i> expression vector, Amp <sup>r</sup>                                                                                                                                                                                                                                                                             | Novagen             |
| pET <i>cbpA</i>                          | pET22b+ derivative carrying the NdeI-XhoI fragment encoding CbpA                                                                                                                                                                                                                                                               | [10]                |
| pET <i>cdpA</i>                          | pET22b+ derivative carrying the NdeI-XhoI fragment encoding CdpA                                                                                                                                                                                                                                                               | This study          |
| pET <i>cdpB</i>                          | pET22b+ derivative carrying the NdeI-XhoI fragment encoding CdpB                                                                                                                                                                                                                                                               | This study          |
| pET <i>cdpC</i>                          | pET22b+ derivative carrying the NdeI-XhoI fragment encoding CdpC                                                                                                                                                                                                                                                               | This study          |
| pMTL007                                  | <i>E. coli/Clostridium</i> shuttle vector (ColE1, pCB102)LI. <i>ltr</i> Bintron ( <i>ermBtdRAM2</i> ) under the control of <i>P</i> <i>fac</i> , <i>ltrA</i> ; Cm <sup>r</sup> /Tm <sup>r</sup>                                                                                                                                | [25]                |
| pMTL <i>cbpA</i>                         | pMTL007 derivative targeting <i>cbpA</i> (locus Ccel_2109)                                                                                                                                                                                                                                                                     | This study          |
| pMTL <i>cdpA</i>                         | pMTL007 derivative targeting <i>cdpA</i> (locus Ccel_1439)                                                                                                                                                                                                                                                                     | This study          |
| pMTL <i>cdpB</i>                         | pMTL007 derivative targeting <i>cdpB</i> (locus Ccel_2354)                                                                                                                                                                                                                                                                     | This study          |
| pMTL <i>cdpC</i>                         | pMTL007 derivative targeting <i>cdpC</i> (locus Ccel_3412)                                                                                                                                                                                                                                                                     | This study          |
| pSOSzeroTm                               | <i>E. coli/Clostridium</i> shuttle vector (ColE1, pIM13); Ap <sup>r</sup> , Cm <sup>r</sup> /Tm <sup>r</sup>                                                                                                                                                                                                                   | [31]                |
| pSOS <i>cbpA</i>                         | pSOS956 <i>E. coli/Clostridium</i> shuttle vector (ColE1, pIM13); Ap <sup>r</sup> , Cm <sup>r</sup> /Tm <sup>r</sup> , derivative, carrying the BamHI-NarI fragment encoding full length <i>cbpA</i> , under the control of a weakened <i>Clostridium acetobutylicum</i> <i>thiolase</i> gene promotor ( <i>P</i> <i>thi</i> ) | [10]                |

Ap<sup>r</sup>, ampicilline resistance; Erm<sup>r</sup>, erythromycin resistance; Cm<sup>r</sup>/Tm<sup>r</sup>, chloramphenicol/thiamphenicol resistance
