# Supplementary material for: In vitro and in vivo exploration of the cellobiose and cellodextrin phosphorylases panel in Ruminiclostridium cellulolyticum: implication for cellulose catabolism
Source: PubMed Central journal article supplement (PMC6720390; doi:10.1186/s13068-019-1549-x), 2019-09-03
Supplement: 13068_2019_1549_MOESM6_ESM.pdf [file 13068_2019_1549_MOESM6_ESM.pdf]

## Additional file 6. Primer sequences used in the present study

| EXPERIMENT                   | NAME                     | SEQUENCE                                                     | FEATURES                              |
|------------------------------|--------------------------|--------------------------------------------------------------|---------------------------------------|
| Targeted mutagenesis         | IBS <b>cbpA</b> _1668a   | AAAAAAGCTTATAATTATCCTTATTCGCCGTCCCAAGTGCGCCCAGATAGGGTG       |                                       |
|                              | EBS1 <b>dcbpA</b> _1668a | CAGATTGTACAAATGTGGTGATAACAGATAAGTCGTCCCAACTAACTTACCTTTCTTTGT |                                       |
|                              | EBS2 <b>cbpA</b> _1668a  | TGAACGCAAGTTTCTAATTTCCGGTTGCGAATCGATAGAGGAAAGTGTCT           |                                       |
|                              | EBS universal            | CGAAATTAGAAACTTGCCTTCAGTAAAC                                 |                                       |
|                              | IBS <b>cdpA</b> _537s    | AAAAAAGCTTATAATTATCCTTAAGATTCGATGATGTGCGCCCAGATAGGGTG        |                                       |
|                              | EBS1 <b>dcdpA</b> _537s  | CAGATTGTACAAATGTGGTGATAACAGATAAGTCGATGATGGTAACTTACCTTTCTTTGT |                                       |
|                              | EBS2 <b>cdpA</b> _537s   | TGAACGCAAGTTTCTAATTTCCGATTAATCTTCGATAGAGGAAAGTGTCT           |                                       |
|                              | IBS <b>cdpB</b> _53a     | AAAAAAGCTTATAATTATCCTTAGTAGGCGTATCGGTGCGCCCAGATAGGGTG        |                                       |
|                              | EBS1 <b>dcdpB</b> _53a   | CAGATTGTACAAATGTGGTGATAACAGATAAGTCGTATCGGGTAACTTACCTTTCTTTGT |                                       |
|                              | EBS2 <b>cdpB</b> _53a    | TGAACGCAAGTTTCTAATTTCCGATTCCTACTCGATAGAGGAAAGTGTCT           |                                       |
|                              | IBS <b>cdpC</b> _480a    | AAAAAAGCTTATAATTATCCTTAATTTTCATAGTGGTGCGCCCAGATAGGGTG        |                                       |
|                              | EBS1 <b>dcdpC</b> _480a  | CAGATTGTACAAATGTGGTGATAACAGATAAGTCATAGTGGTAACTTACCTTTCTTTGT  |                                       |
|                              | EBS2 <b>cdpC</b> _480a   | TGAACGCAAGTTTCTAATTTCCGGTAAAAATCCGATAGAGGAAAGTGTCT           |                                       |
| Control of the mutations     | 2109_1510D               | AAAGATGGGAAAGTGGCAGA                                         |                                       |
|                              | 2109_1785R               | CTCCGCCATAGAACAGAAGC                                         |                                       |
|                              | 1439-454D                | TCGGAGTTTTGCTTCTGGGA                                         |                                       |
|                              | 1439-694R                | TACTGCAAGCTCCCTGTTCT                                         |                                       |
|                              | 2354_2D                  | TGAATTACGGTTATTTTGATGATTG                                    |                                       |
|                              | 2354_261R                | CCAGGAGGCTGACCAGTAAT                                         |                                       |
|                              | 3412_298D                | GAGTGCAGACATGGAAGTGC                                         |                                       |
|                              | 3412_583R                | CGCTGCCGTTTTTCATTTATT                                        |                                       |
| Production in <i>E. coli</i> | 1439NdeI <b>dir</b>      | TTAA <b>CATATG</b> AGATTCGGGTATTTTGACCG                      | NdeI is underlined, ATG boldface type |
|                              | 1439XhoI <b>rev</b>      | TTTT <b>CTCGAG</b> TTTCATTACAACGACTACATTGTGC                 | XhoI is underlined                    |
|                              | 1439_a951t_rev           | ATACTGATTCCAAATGTTTACAAACAGATTC                              |                                       |
|                              | 1439_a951t_dir           | TTTGTAACATTTGGAATCAGTATCAGTGC                                |                                       |
|                              | 2354NdeI <b>dir</b>      | TTAA <b>CATATG</b> AATTACGGTTATTTTGATGATTGT                  | NdeI is underlined, ATG boldface type |
|                              | 2354XhoI <b>rev</b>      | TTAA <b>CTCGAG</b> ACCCATAATTACCTGAACAGTATTAC                | XhoI is underlined                    |
|                              | 3412NdeI <b>dir</b>      | TTAA <b>CATATG</b> AATTTTGGTCATTTTAATCCAGT                   | NdeI is underlined, ATG boldface type |
|                              | 3412XhoI <b>rev</b>      | ATTT <b>CTCGAG</b> CTTACCCACTACTACTAATATTTTCATTAGTATC        | XhoI is underlined                    |

| EXPERIMENT     | NAME       | SEQUENCE               | FEATURES |
|----------------|------------|------------------------|----------|
| <b>qRT-PCR</b> | 16SFrw     | CTATGTTTCTTGAGTGCCGG   |          |
|                | 16Srev     | ATACTTATTGTTGTAAGTCCGG |          |
|                | 2109F      | ATGAGTGCAGGCATGGTTTG   |          |
|                | 2109R      | ACCGAGTTCTCAACTTCAACC  |          |
|                | q1439_454D | TCGGAGTTTTGCTTCTGGGA   |          |
|                | q1439_694R | TACTGCAAGCTCCCTGTTCT   |          |
|                | q2354_374D | TTCCGTTGGGTCAAACCAC    |          |
|                | q2354_589R | CCCTTTCCTCGGTCAGTTCT   |          |
|                | q3412_456D | TACGGCGGAATTCACAAACC   |          |
|                | q3412_676R | CGAAAGCAGAAACGGACTGG   |          |
