# Supplementary material for: In vitro and in vivo exploration of the cellobiose and cellodextrin phosphorylases panel in Ruminiclostridium cellulolyticum: implication for cellulose catabolism
Source: PubMed Central journal article supplement (PMC6720390; doi:10.1186/s13068-019-1549-x), 2019-09-03
Supplement: 13068_2019_1549_MOESM7_ESM.pdf [file 13068_2019_1549_MOESM7_ESM.pdf]

**Additional file 7. Experimental conditions used for enzymatic parameter measurement.**

The tables show the initial velocities measured using optimized experimental conditions (enzyme concentrations and time points) for each cellodextrin phosphorylase and substrate.

|                                     |                                   |                 |                 |                |                |               |               |
|-------------------------------------|-----------------------------------|-----------------|-----------------|----------------|----------------|---------------|---------------|
| Enzyme concentration                | <b>CdpA 0.1 <math>\mu</math>M</b> |                 |                 |                |                |               |               |
| Substrate                           | Cellotetraose                     |                 |                 |                |                |               |               |
| Substrate concentration (mM)        | 20                                | 10              | 5               | 3.33           | 1              | 0.4           | 0.2           |
| Incubation time (minutes)           | 10                                |                 |                 |                |                |               |               |
| Cellotriose increase ( $\mu$ M/min) | 112.2 $\pm$ 3.3                   | 181.9 $\pm$ 6.2 | 103.3 $\pm$ 2.2 | 49.6 $\pm$ 2.6 | 17.5 $\pm$ 0.2 | 7.2 $\pm$ 0.4 | 3.9 $\pm$ 0.1 |

|                                                       |                                   |                  |                 |                |                |               |  |
|-------------------------------------------------------|-----------------------------------|------------------|-----------------|----------------|----------------|---------------|--|
| Enzyme concentration                                  | <b>CdpA 0.1 <math>\mu</math>M</b> |                  |                 |                |                |               |  |
| Substrate                                             | Cellopentaose                     |                  |                 |                |                |               |  |
| Substrate concentration (mM)                          | 8.48                              | 5                | 3.33            | 1              | 0.4            | 0.2           |  |
| Incubation time (minutes)                             | 5                                 |                  |                 |                |                |               |  |
| Cellotetraose and cellotriose increase ( $\mu$ M/min) | 176.2 $\pm$ 18.5                  | 134.1 $\pm$ 11.8 | 126.2 $\pm$ 4.3 | 39.9 $\pm$ 1.8 | 19.5 $\pm$ 0.2 | 9.9 $\pm$ 0.7 |  |

|                                     |                                 |                |                 |               |               |  |
|-------------------------------------|---------------------------------|----------------|-----------------|---------------|---------------|--|
| Enzyme concentration                | <b>CdpB 2 <math>\mu</math>M</b> |                |                 |               |               |  |
| Substrate                           | Cellotetraose                   |                |                 |               |               |  |
| Substrate concentration (mM)        | 10                              | 5              | 3.33            | 0.2           | 0.133         |  |
| Incubation time (minutes)           | 10                              |                |                 |               |               |  |
| Cellotriose increase ( $\mu$ M/min) | 100.1 $\pm$ 5.2                 | 73.0 $\pm$ 3.5 | 57.1 $\pm$ 13.4 | 4.5 $\pm$ 0.2 | 3.5 $\pm$ 0.3 |  |

|                                    |                                   |                  |                 |                 |                  |                |                |
|------------------------------------|-----------------------------------|------------------|-----------------|-----------------|------------------|----------------|----------------|
| Enzyme concentration               | <b>CdpC 0.1 <math>\mu</math>M</b> |                  |                 |                 |                  |                |                |
| Substrate                          | Cellotriose                       |                  |                 |                 |                  |                |                |
| Substrate concentration (mM)       | 20                                | 10               | 5               | 3.33            | 1                | 0.4            | 0.2            |
| Incubation time (minutes)          | 5                                 |                  |                 |                 |                  |                |                |
| Cellobiose increase ( $\mu$ M/min) | 780.9 $\pm$ 10.0                  | 536.8 $\pm$ 47.1 | 389.6 $\pm$ 5.8 | 293.3 $\pm$ 3.0 | 114.2 $\pm$ 10.1 | 50.3 $\pm$ 0.8 | 27.6 $\pm$ 0.5 |
